# Supplementary material for: Disentangling self-management goal setting and action planning: A scoping review
Source: PubMed Central journal article supplement (PMC5703565; doi:10.1371/journal.pone.0188822), 2017-11-27
Supplement: pone.0188822.s001.pdf [file pone.0188822.s001.pdf]

S2 Table. Overview of Phases and Components for each Article

| Articles                                 | Phases            |                    |                                            |                      |                            |                            |                                |                          |                                                |                         |                         |                        |
|------------------------------------------|-------------------|--------------------|--------------------------------------------|----------------------|----------------------------|----------------------------|--------------------------------|--------------------------|------------------------------------------------|-------------------------|-------------------------|------------------------|
|                                          | Preparation       |                    |                                            | Formulation of goals | Formulation of action plan | Coping planning            |                                |                          |                                                | Follow up               |                         |                        |
|                                          | Patient education | Patient reflection | Identification of topics for setting goals | Formulation of goals | Formulation of action plan | Identification of barriers | Identification of facilitators | Assessment of confidence | Formulation of strategies to overcome barriers | Patient self-monitoring | Support for the patient | Evaluation of progress |
| Arbour-Nicitopoulos et al. (2003)        |                   |                    |                                            |                      | x                          | x                          |                                |                          | x                                              | x                       |                         | x                      |
| Bacelar de Araujo Lourenco et al. (2013) |                   |                    |                                            |                      | x                          | x                          |                                |                          | x                                              |                         | x                       |                        |
| Bearon et al. (2000)                     |                   |                    |                                            | x                    |                            |                            |                                |                          |                                                | x                       |                         |                        |
| Becker et al. (2009)                     | x                 |                    |                                            | x                    |                            |                            |                                |                          | x                                              |                         |                         | x                      |
| Briggs-Early et al. (2009)               |                   |                    |                                            | x                    |                            | x                          |                                |                          | x                                              |                         |                         |                        |
| Buechi et al. (2010)                     |                   |                    | x                                          | x                    |                            |                            |                                |                          |                                                |                         |                         |                        |
| Calfas et al. (2002)                     |                   | x                  |                                            | x                    | x                          | x                          | x                              |                          | x                                              |                         | x                       |                        |
| Cho (2013)                               |                   | x                  |                                            | x                    | x                          | x                          | x                              |                          |                                                |                         | x                       | x                      |
| Christiansen et al. (2010)               |                   | x                  |                                            |                      | x                          | x                          |                                |                          | x                                              |                         |                         |                        |
| Chunchu et al. (2012)                    |                   | x                  |                                            | x                    | x                          | x                          |                                | x                        |                                                | x                       |                         | x                      |
| Corser et al. (2007)                     | x                 |                    |                                            | x                    |                            |                            |                                |                          |                                                |                         | x                       |                        |
| Coote & MacLeod (2012)                   | x                 |                    |                                            | x                    | x                          | x                          |                                |                          | x                                              | x                       | x                       |                        |
| Custer et al. (2013)                     |                   |                    |                                            | x                    |                            |                            |                                |                          |                                                |                         |                         | x                      |
| Davis & White (2008)                     | x                 |                    |                                            | x                    |                            |                            |                                |                          |                                                | x                       |                         | x                      |
| DeWalt et al. (2007)                     | x                 |                    |                                            | x                    | x                          | x                          |                                | x                        | x                                              |                         |                         | x                      |
| Dickman et al. (2012)                    |                   | x                  |                                            | x                    | x                          |                            |                                |                          |                                                |                         |                         |                        |
| Doughty et al. (2008)                    | x                 |                    |                                            |                      | x                          |                            |                                |                          |                                                |                         |                         |                        |
| Estabrooks et al. (2005)                 |                   | x                  |                                            | x                    | x                          | x                          |                                |                          | x                                              |                         |                         | x                      |
| Evans-Hudnall et al. (2014)              | x                 | x                  |                                            | x                    | x                          |                            |                                |                          | x                                              | x                       | x                       |                        |
| Fuchs et al. (2011)                      |                   | x                  |                                            | x                    | x                          |                            |                                |                          | x                                              | x                       |                         | x                      |
| Glasgow et al. (2012)                    | x                 |                    |                                            | x                    | x                          | x                          |                                |                          | x                                              | x                       | x                       |                        |
| Glasgow et al. (1996)                    |                   | x                  |                                            | x                    | x                          |                            |                                | x                        |                                                |                         | x                       |                        |
| Glasgow et al. (2002)                    |                   | x                  |                                            | x                    |                            | x                          |                                |                          |                                                |                         | x                       | x                      |
| Harris & Eng (2004)                      |                   | x                  | x                                          | x                    |                            |                            |                                |                          |                                                |                         |                         |                        |
| Hart (1978)                              |                   |                    | x                                          | x                    | x                          |                            |                                |                          |                                                |                         |                         | x                      |
| Holtrop et al. (2006)                    | x                 |                    |                                            | x                    |                            |                            |                                |                          |                                                |                         | x                       | x                      |
| Kjeken et al. (2014)                     |                   |                    |                                            | x                    | x                          |                            |                                | x                        |                                                |                         | x                       |                        |
| Kroese et al. (2014)                     |                   |                    |                                            | x                    | x                          | x                          |                                |                          | x                                              | x                       | x                       | x                      |
| Luszczynska (2006)                       | x                 |                    |                                            |                      | x                          |                            |                                |                          |                                                |                         | x                       |                        |
| Lyons et al. (2015)                      | x                 |                    | x                                          | x                    | x                          | x                          |                                |                          | x                                              | x                       |                         |                        |
| Magar et al. (2005)                      | x                 |                    |                                            |                      | x                          |                            |                                |                          |                                                | x                       |                         |                        |
