# Supplementary material for: Disentangling self-management goal setting and action planning: A scoping review
Source: PubMed Central journal article supplement (PMC5703565; doi:10.1371/journal.pone.0188822), 2017-11-27
Supplement: pone.0188822.s002.pdf [file pone.0188822.s002.pdf]

S3 Table. Overview of Mode of Delivery, Phases, Components and Strategies for each Article

|                                          | Mode of delivery                                                                                             | Phases                                 | Components                                     | Strategies                                                                                                                                                                                                                                                                                                                                                                                                            |
|------------------------------------------|--------------------------------------------------------------------------------------------------------------|----------------------------------------|------------------------------------------------|-----------------------------------------------------------------------------------------------------------------------------------------------------------------------------------------------------------------------------------------------------------------------------------------------------------------------------------------------------------------------------------------------------------------------|
| Arbour-Nicitopoulos et al. (2003)        | 1 individual meeting (20 – 30 min), 1 call, follow up: 10 weeks                                              | Formulation of an action plan          |                                                | Calendars for patients: Recording time, place, number of minutes and intensity of physical activity                                                                                                                                                                                                                                                                                                                   |
|                                          |                                                                                                              | Coping planning                        | Identification of barriers                     |                                                                                                                                                                                                                                                                                                                                                                                                                       |
|                                          |                                                                                                              |                                        | Formulation of strategies to overcome barriers | Recording on planning sheets for patients at home                                                                                                                                                                                                                                                                                                                                                                     |
|                                          |                                                                                                              | Follow-up                              | Patient self-monitoring                        | Logbooks (10 weeks)                                                                                                                                                                                                                                                                                                                                                                                                   |
| Evaluation of progress                   | Telephone call (in week 5)                                                                                   |                                        |                                                |                                                                                                                                                                                                                                                                                                                                                                                                                       |
| Bacelar de Araujo Lourenco et al. (2013) | 2 individual meetings, 2 calls, follow up: 2 months                                                          | Formulation of action plan             |                                                | Implementation intentions for medication adherence: Action plan covering when, where and how                                                                                                                                                                                                                                                                                                                          |
|                                          |                                                                                                              | Coping planning                        | Identification of barriers                     |                                                                                                                                                                                                                                                                                                                                                                                                                       |
|                                          |                                                                                                              |                                        | Formulation of strategies to overcome barriers |                                                                                                                                                                                                                                                                                                                                                                                                                       |
| Follow-up                                | Support for the patient                                                                                      | Telephone calls (after 15 and 45 days) |                                                |                                                                                                                                                                                                                                                                                                                                                                                                                       |
| Bearon et al. (2000)                     | 2 individual meetings (baseline and outcome interview)                                                       | Formulation of goals                   |                                                | Personal Functional Goals Checklist: Naming and prioritizing goals with a 45-item checklist of goals for physical/mental health, daily living, general well-being                                                                                                                                                                                                                                                     |
|                                          |                                                                                                              | Follow-up                              | Patient self-monitoring                        | Open-ended questions to reflect on wishes, hopes, fears and worries for future; ladder rating to reflect on present status in 8 self-selected functional areas: Pointing to a rung on a picture of a ladder (top rung (10) represents the best possible)                                                                                                                                                              |
| Becker et al. (2009)                     | 8 group sessions (weekly, 2 hours), 1 individual meeting, 6 calls (bimonthly, 3 months), follow up: 8 months | Preparation                            | Patient education                              |                                                                                                                                                                                                                                                                                                                                                                                                                       |
|                                          |                                                                                                              | Formulation of goals                   |                                                | Setting 2– 4 specific, feasible and measurable goals (for physical activity, nutrition, stress management, relationship/intimacy, life style adjustment, health management); Goal Attainment Scaling (GAS): Use of a 5-point scale (Zero point: Expected outcome/ goal, +1: a somewhat better than expected outcome, +2: the most favorable outcome, -1: a less than expected outcome, -2: a least favorable outcome) |
|                                          |                                                                                                              | Coping planning                        | Formulation of strategies to overcome barriers | Motivational interviewing                                                                                                                                                                                                                                                                                                                                                                                             |
|                                          |                                                                                                              | Follow-up                              | Evaluation of progress                         |                                                                                                                                                                                                                                                                                                                                                                                                                       |

|                            | <b>Mode of delivery</b>                                                                                                        | <b>Phases</b>                                                            | <b>Components</b>                              | <b>Strategies</b>                                                                                                                                                                                                     |
|----------------------------|--------------------------------------------------------------------------------------------------------------------------------|--------------------------------------------------------------------------|------------------------------------------------|-----------------------------------------------------------------------------------------------------------------------------------------------------------------------------------------------------------------------|
| Briggs-Early et al. (2009) | 1 individual meeting (40 min)                                                                                                  | Formulation of goals                                                     |                                                | "Reach for a goal": List of suggested self-management areas (exercise, diet, medication, eye exam, quit smoking, self-monitor blood sugar, and daily foot care) including a picture for each associated word/phrase.  |
|                            |                                                                                                                                | Coping planning                                                          | Identification of barriers                     | Use of the term "road block" to talk about barriers and strategies                                                                                                                                                    |
|                            |                                                                                                                                |                                                                          | Formulation of strategies to overcome barriers |                                                                                                                                                                                                                       |
| Buechi et al. (2010)       | 1 individual meeting (45 min)                                                                                                  | Preparation                                                              | Identification of topics for goals             | Open questions; use of Pictorial Representation of Illness and Self-Measure (PRISM): Visualization (by means of a white board and moveable discs) of problems and resources, setting problem goals and resource goals |
|                            |                                                                                                                                | Formulation of goals                                                     | Formulation of goals                           |                                                                                                                                                                                                                       |
| Calfas et al. (2002)       | 1 individual meeting (2 – 5 min), 8 bimonthly mails or 3 10-min calls and mails every 6 weeks OR weekly 10-min calls and mails | Preparation                                                              | Patient reflection                             | Computer to assess current behavior and compare current behavior to guidelines (exercise and nutrition)                                                                                                               |
|                            |                                                                                                                                | Formulation of goals                                                     |                                                |                                                                                                                                                                                                                       |
|                            |                                                                                                                                | Formulation of action plan                                               |                                                | Developing an action plan for exercise and nutrition on the computer; printing the action plan                                                                                                                        |
|                            |                                                                                                                                | Coping planning                                                          | Identification of barriers                     |                                                                                                                                                                                                                       |
|                            |                                                                                                                                |                                                                          | Identification of facilitators                 |                                                                                                                                                                                                                       |
|                            |                                                                                                                                |                                                                          | Formulation of strategies to overcome barriers |                                                                                                                                                                                                                       |
| Follow-up                  | Support for the patient                                                                                                        | Telephone calls and/or mails with behavioral suggestions and information |                                                |                                                                                                                                                                                                                       |
| Cho (2013)                 | 4 weekly group meetings (30 – 60 min)                                                                                          | Preparation                                                              | Patient reflection                             | Self-care log (fistula management, blood pressure, body weight management, exercise and eating); group meetings with focus on knowledge and self-efficacy                                                             |
|                            |                                                                                                                                | Formulation of goals                                                     |                                                | Contracting: Goals for one week and goal achievement methods are written down on contract that is signed by patient and professional                                                                                  |
|                            |                                                                                                                                | Formulation of action plan                                               |                                                |                                                                                                                                                                                                                       |
|                            |                                                                                                                                | Coping planning                                                          | Identification of barriers                     |                                                                                                                                                                                                                       |
|                            |                                                                                                                                |                                                                          | Identification of facilitators                 |                                                                                                                                                                                                                       |
|                            |                                                                                                                                | Follow-up                                                                | Support for the patient                        | Praise, encouragement and support during usual dialysis sessions                                                                                                                                                      |
| Evaluation of progress     | Self-care logs                                                                                                                 |                                                                          |                                                |                                                                                                                                                                                                                       |

|                            | Mode of delivery                                    | Phases                                                              | Components                                     | Strategies                                                                                                                                                                                                                                                      |
|----------------------------|-----------------------------------------------------|---------------------------------------------------------------------|------------------------------------------------|-----------------------------------------------------------------------------------------------------------------------------------------------------------------------------------------------------------------------------------------------------------------|
| Christiansen et al. (2010) | 2 individual meetings (30 min)                      | Preparation                                                         | Patient reflection                             | Rating of expectations of success and incentive value with a 11 point response scale; mental contrasting: Listing 4 positive aspects of desired behavior (exercising more) and 4 obstacles, elaboration and visualization of the positive aspects and obstacles |
|                            |                                                     | Coping planning                                                     | Identification of barriers                     | Cognitive behavioral principles of problem solving                                                                                                                                                                                                              |
|                            |                                                     |                                                                     | Formulation of strategies to overcome barriers |                                                                                                                                                                                                                                                                 |
| Formulation of action plan |                                                     | Implementation intention (Action plan covering when, where and how) |                                                |                                                                                                                                                                                                                                                                 |
| Chunchu et al. (2012)      | Routine long-term chronic care                      | Preparation                                                         | Patient reflection                             | Routine consultations family physician: Identification of preferences and values through dialog, use of a Patient Centered Care Plan (PCCP) in the Electronic Health Record (HER) (3 sections: About Me, My Goals, My Progress)                                 |
|                            |                                                     | Formulation of goals                                                |                                                |                                                                                                                                                                                                                                                                 |
|                            |                                                     | Formulation of action plan                                          |                                                |                                                                                                                                                                                                                                                                 |
|                            |                                                     | Coping planning                                                     | Identification of barriers                     |                                                                                                                                                                                                                                                                 |
|                            |                                                     |                                                                     | Assessment of confidence                       |                                                                                                                                                                                                                                                                 |
| Follow-up                  | Evaluation of progress                              |                                                                     |                                                |                                                                                                                                                                                                                                                                 |
| Corser et al. (2007)       | 2 group meetings (120 min), workbook for patients   | Preparation                                                         | Patient education                              | Education about medical evidence and the concept of shared decision making; workbook for patients with checklist and tools to help them set goals and discuss goals with their physician (28 pages)                                                             |
|                            |                                                     | Formulation of goals                                                |                                                |                                                                                                                                                                                                                                                                 |
|                            |                                                     | Follow-up                                                           | Support                                        |                                                                                                                                                                                                                                                                 |
| Coote & MacLeod (2012)     | Workbook for patients (5 weeks), 1 call (in week 2) | Preparation                                                         | Patient education                              | Goal Setting And Planning Skills Manual (46 pages): Focus on setting positive goals for well-being, including practical tasks and worksheets                                                                                                                    |
|                            |                                                     | Formulation of goals                                                |                                                |                                                                                                                                                                                                                                                                 |
|                            |                                                     | Formulation of action plan                                          |                                                |                                                                                                                                                                                                                                                                 |
|                            |                                                     | Coping planning                                                     | Identification of barriers                     |                                                                                                                                                                                                                                                                 |
|                            |                                                     |                                                                     | Formulation of strategies to overcome barriers |                                                                                                                                                                                                                                                                 |
| Follow-up                  | Support for the patient                             | Telephone call (week 2): Support and identifying new goals          |                                                |                                                                                                                                                                                                                                                                 |
|                            | Evaluation of progress                              |                                                                     |                                                |                                                                                                                                                                                                                                                                 |
| Custer et al. (2013)       | 2 individual meetings (intake and follow up)        | Formulation of goals                                                |                                                | Goals for Occupational Therapy List (GOTL): 25 item checklist that allows patients to select 3 goals for occupational therapy                                                                                                                                   |
|                            |                                                     | Follow-up                                                           | Evaluation of progress                         | Goal Satisfaction Rating: For each goal, patients rate their goal achievement and satisfaction on a 5 point scale.                                                                                                                                              |

|                       | <b>Mode of delivery</b>                                                                                        | <b>Phases</b>              | <b>Components</b>                              | <b>Strategies</b>                                                                                                                                                                                                                       |
|-----------------------|----------------------------------------------------------------------------------------------------------------|----------------------------|------------------------------------------------|-----------------------------------------------------------------------------------------------------------------------------------------------------------------------------------------------------------------------------------------|
| Davis & White (2008)  | 3 group meetings (1 h), 2 individual meeting with 2 nurses, 3 calls, workbook for patients, duration: 4 months | Preparation                | Patient education                              | Group meetings: Education about pain management and goal-setting, exercises and strategies for pain modulation and pain relief using medicine and physical measures; notebook for patients (with exercises pain management)             |
|                       |                                                                                                                | Formulation of goals       |                                                | Goal Attainment Scaling (GAS): Use of a 5-point scale (Zero point: Expected outcome/goal, +1: a somewhat better than expected outcome, +2: the most favorable outcome, -1: a less than expected outcome, -2: a least favorable outcome) |
|                       |                                                                                                                | Follow-up                  | Patient self-monitoring                        | Diary                                                                                                                                                                                                                                   |
|                       |                                                                                                                |                            | Evaluation of progress                         | Telephone calls, GAS: Use of the 5-point scale (see formulation of goals) to rate goal attainment                                                                                                                                       |
| DeWalt et al. (2007)  | 1 individual meeting (15 min), 2 calls, workbook for patients                                                  | Preparation                | Patient education                              | Guide "Living with Diabetes": Education about diet, exercise, monitoring, blood sugar, foot exams, insulin and other medicines, each chapter of the guide ends with a section to set small achievable goals                             |
|                       |                                                                                                                | Formulation of goals       |                                                |                                                                                                                                                                                                                                         |
|                       |                                                                                                                | Formulation of action plan |                                                | Action plans should be behavioral and specific about how, when and where                                                                                                                                                                |
|                       |                                                                                                                | Coping planning            | Assessment of confidence                       | Self-rating of confidence to carry out the action plan on a scale from 0 - 10                                                                                                                                                           |
|                       |                                                                                                                |                            | Identification of barriers                     | Telephone calls (after 2 and 4 weeks)                                                                                                                                                                                                   |
|                       |                                                                                                                |                            | Formulation of strategies to overcome barriers |                                                                                                                                                                                                                                         |
| Follow-up             | Evaluation of progress                                                                                         |                            |                                                |                                                                                                                                                                                                                                         |
| Dickman et al. (2012) | Shared medical appointments (SMA) (8 – 12 participants, 90 min)                                                | Preparation                | Patient reflection                             | Reflection on current behavior (regarding nutrition, exercise and blood glucose monitoring) by means of discussions during SMA and by means of a questionnaire                                                                          |
|                       |                                                                                                                | Formulation of goals       |                                                | "My Action Plan": Pictorial standard plan to set goals and plan actions                                                                                                                                                                 |
|                       |                                                                                                                | Formulation of action plan |                                                |                                                                                                                                                                                                                                         |
| Doughty et al. (2008) | 4 group meetings/ workshops (1 or 2 full days)                                                                 | Preparation                | Education                                      | Small group discussions about and exchanging experience over: Recovery concepts, getting medical care and handling medication, tools to use in daily life to enhance wellness, identification of triggers and symptoms                  |
|                       |                                                                                                                | Formulation of action plan |                                                | Personal crisis plan: List of supporters (their roles and phone numbers), medication the person uses, symptoms that indicate the person needs their supporters and instructions that what supporters                                    |

|                             | <b>Mode of delivery</b>                                                             | <b>Phases</b>              | <b>Components</b>                                       | <b>Strategies</b>                                                                                                                                                                                          |
|-----------------------------|-------------------------------------------------------------------------------------|----------------------------|---------------------------------------------------------|------------------------------------------------------------------------------------------------------------------------------------------------------------------------------------------------------------|
| Estabrooks et al. (2005)    | Computer session (30 – 45 min), 1 individual meeting (8 – 10 min), 1 call           | Preparation                | Patient reflection                                      | Interactive computerized touch screen CD ROM session to self-asses current behavior and compare it to recommended guidelines (dietary intake and physical activity)                                        |
|                             |                                                                                     | Formulation of goals       |                                                         | Computer to set goals and plan actions, generation of a printed copy of the action plan for the patient                                                                                                    |
|                             |                                                                                     | Formulation of action plan |                                                         |                                                                                                                                                                                                            |
|                             |                                                                                     | Coping planning            | Identification of barriers                              |                                                                                                                                                                                                            |
|                             |                                                                                     |                            |                                                         | Formulation of strategies to overcome barriers                                                                                                                                                             |
| Follow-up                   |                                                                                     | Evaluation of progress     | Individual meeting, telephone call (2 weeks later)      |                                                                                                                                                                                                            |
| Evans-Hudnall et al. (2014) | 1 individual session (30 – 45 min), 2 calls, workbook for patients                  | Preparation                | Patient education                                       | Patient workbook: Education about signs and symptoms, risk factors, behavioral strategies, resources for assistance, dietary and exercise tracking forms.                                                  |
|                             |                                                                                     |                            | Patient reflection                                      | Diary about diet, physical activity, medication adherence, tobacco use and alcohol use                                                                                                                     |
|                             |                                                                                     | Formulation of goals       |                                                         | Individual meetings: Use of cognitive behavioral principles (cognitive restructuring, strategies for social support, stimulus control, stress management, relapse prevention), patient workbook            |
|                             |                                                                                     | Coping planning            | Identification of barriers                              |                                                                                                                                                                                                            |
|                             |                                                                                     |                            | Formulation of strategies to overcome barriers          |                                                                                                                                                                                                            |
|                             |                                                                                     | Formulation of action plan |                                                         | Formulation of action plan                                                                                                                                                                                 |
| Follow-up                   |                                                                                     | Support                    | Telephone calls (biweekly over 4 weeks after discharge) |                                                                                                                                                                                                            |
| Fuchs et al. (2011)         | 2 group meetings (6 patients, 60 - 90 min), 1 individual interview (10 min), 1 call |                            | Evaluation of progress                                  |                                                                                                                                                                                                            |
|                             |                                                                                     | Formulation of goals       |                                                         | Asking participants for objectives and willingness to work on goals and checking self-concordance by asking participants whether the goal is really their own or merely an introjection of others          |
|                             |                                                                                     | Preparation                | Patient reflection                                      | Contemplation of actions: Balancing the pros and cons of actions and reflecting on self-efficacy beliefs; reflection on outcome experiences: Consciously notice the positive consequences of new behavior. |
|                             |                                                                                     | Formulation of action plan | Formulation of action plan                              | Implementation intentions for exercise: Action plan covering when, where and how                                                                                                                           |
|                             |                                                                                     | Coping planning            | Formulation of strategies to overcome barriers          |                                                                                                                                                                                                            |
|                             |                                                                                     | Follow-up                  | Patient self-monitoring                                 | Recording behavior and sending it to the professional                                                                                                                                                      |
| Evaluation of progress      | Telephone call (5 weeks after discharge) Telephone call (5 weeks after discharge)   |                            |                                                         |                                                                                                                                                                                                            |

|                         | <b>Mode of delivery</b>                                                                          | <b>Phases</b>                                                                                            | <b>Components</b>                              | <b>Strategies</b>                                                                                                                                                                                                                                                                                                                                                                              |
|-------------------------|--------------------------------------------------------------------------------------------------|----------------------------------------------------------------------------------------------------------|------------------------------------------------|------------------------------------------------------------------------------------------------------------------------------------------------------------------------------------------------------------------------------------------------------------------------------------------------------------------------------------------------------------------------------------------------|
| Glasgow et al. (2012)   | Individual use of a website, for one intervention group also: 2 follow up calls, 1 group session | Preparation                                                                                              | Patient education                              | Website "My Path to health Life": Short video about controlling hemoglobin A1c, blood pressure, cholesterol, following advice regarding medication, adherences, exercise and food                                                                                                                                                                                                              |
|                         |                                                                                                  | Formulation of goals                                                                                     |                                                | "My Path to health Life": Selection of achievable goals from a set of preset goals to enhance self-efficacy in medication adherence, exercise and food choices                                                                                                                                                                                                                                 |
|                         |                                                                                                  | Follow-up                                                                                                | Patient self-monitoring                        | "My Path to health Life": Tracking behavior (at least weekly) or use of an interactive voice response phone system                                                                                                                                                                                                                                                                             |
|                         |                                                                                                  |                                                                                                          | Support for the patient                        | Motivational messages (weekly): Feedback on success or struggles                                                                                                                                                                                                                                                                                                                               |
|                         |                                                                                                  | Formulation of action plan                                                                               |                                                | "My Path to health Life": Choosing from prescribed actions to create an action plan to meet goals (with option "write your own actions")                                                                                                                                                                                                                                                       |
|                         |                                                                                                  | Coping planning                                                                                          | Identification of barriers                     | "My Path to health Life": Choosing from prescribed barriers and strategies (with option "write your own")                                                                                                                                                                                                                                                                                      |
|                         |                                                                                                  |                                                                                                          | Formulation of strategies to overcome barriers |                                                                                                                                                                                                                                                                                                                                                                                                |
| Follow-up               | Support for the patient                                                                          | For one intervention group: Social support through group sessions, telephone calls (after 2 and 8 weeks) |                                                |                                                                                                                                                                                                                                                                                                                                                                                                |
| Glasgow et al. (1996)   | 1 meeting with physician, 1 meeting with intervention staff member (20 min)                      | Preparation                                                                                              | Patient reflection                             | Computer: Self-assessment of fat intake patters and assessment of barriers to dietary self-care, printed one page feedback form with results and suggestions for problems to focus on                                                                                                                                                                                                          |
|                         |                                                                                                  | Formulation of goals                                                                                     |                                                | Printed goal setting worksheet and self-help pamphlet with concrete goals based on assessment results and strategies to achieve goals                                                                                                                                                                                                                                                          |
|                         |                                                                                                  | Formulation of action plan                                                                               | Formulation of action plan                     |                                                                                                                                                                                                                                                                                                                                                                                                |
|                         |                                                                                                  | Coping planning                                                                                          | Assessment of confidence                       | Use of a 100 point scale to rate confidence                                                                                                                                                                                                                                                                                                                                                    |
|                         |                                                                                                  | Follow-up                                                                                                | Support for the patient                        | (Interactive) take-home video (30 min) on most frequent barriers to health eating and strategies to overcome barriers                                                                                                                                                                                                                                                                          |
| Glasgow et al. (2002)   | 3 individual meetings (+ 7 calls or community resources follow up)                               | Preparation                                                                                              | Patient reflection                             | Touchscreen computer: Self-assessment of dietary patterns, barriers to and support for dietary self-management and feedback on current behavior                                                                                                                                                                                                                                                |
|                         |                                                                                                  | Formulation of goals                                                                                     |                                                | Suggestion from the physician for dietary fat reduction goals based on the participant's eating patterns and degree of patient's self-efficacy, hand out with goals                                                                                                                                                                                                                            |
|                         |                                                                                                  | Coping planning                                                                                          | Identification of barriers                     | Motivational interviewing                                                                                                                                                                                                                                                                                                                                                                      |
|                         |                                                                                                  | Follow-up                                                                                                | Evaluation of progress                         | Follow-up visits (after 3 and 6 months): Additional goals for further dietary change with focus on vegetable and fruit intake; relapse prevention and maintenance strategies: 1) Telephone follow-up calls (7 calls, 15 – 20 min) or 2) Community resources follow up (3-ring binder of indexed community resources, 8 newsletters + goal setting for community nutrition support activities). |
| Support for the patient |                                                                                                  |                                                                                                          |                                                |                                                                                                                                                                                                                                                                                                                                                                                                |

|                         | Mode of delivery                                                              | Phases                     | Components                                                       | Strategies                                                                                                                                                                                                                                                                                                                                                                                                                                                                                                                     |
|-------------------------|-------------------------------------------------------------------------------|----------------------------|------------------------------------------------------------------|--------------------------------------------------------------------------------------------------------------------------------------------------------------------------------------------------------------------------------------------------------------------------------------------------------------------------------------------------------------------------------------------------------------------------------------------------------------------------------------------------------------------------------|
| Harris & Eng (2004)     | 1 individual meeting                                                          | Preparation                | Identification of topics for setting goals<br>Patient reflection | Canadian Occupational Performance Measure (semi-structured interview):<br>Exploration of everyday activities that patient perceives difficult to perform (areas: Self-care, productivity and leisure), rating of importance of each activity, prioritizing activities (up to 5), rating the self-perceived performance and satisfaction of activities (Ratings on Visual Analogue Scale from 0 – 10)<br>Total score: Scores identified for each problem or task are added and then divided by the number of problems or tasks. |
|                         |                                                                               | Formulation of goals       |                                                                  |                                                                                                                                                                                                                                                                                                                                                                                                                                                                                                                                |
| Hart (1978)             | Routine care: several consultations                                           | Preparation                | Identification of topics for setting goals                       | Behavioral Monitoring Progress Record: Record including problems areas,<br>4-weeks goals, weekly goals (Observable, definable, measurable), method of attainment (behavioral assignments)                                                                                                                                                                                                                                                                                                                                      |
|                         |                                                                               | Formulation of goals       |                                                                  |                                                                                                                                                                                                                                                                                                                                                                                                                                                                                                                                |
|                         |                                                                               | Formulation of action plan |                                                                  |                                                                                                                                                                                                                                                                                                                                                                                                                                                                                                                                |
|                         |                                                                               | Follow-up                  | Evaluation of progress                                           | Goal Attainment Scaling (GAS): Use of a 5-point scale (Zero point: Expected outcome/goal, +1: a somewhat better than expected outcome, +2: the most favorable outcome, -1: a less than expected outcome, -2: the least favorable outcome); interview with a person from the patient's social environment to validate patient's self-report                                                                                                                                                                                     |
| Holtrop et al. (2006)   | 6 calls (15 – 30 min, after hospital discharge), patient workbook             | Preparation                | Patient education                                                | Booklet for patients (25 page): Education about risks and advantages of changing behavior, identification of at least 1 current behavior (tobacco use, physical activity, healthy eating) and identification of weekly specific, measurable, realistic goals (goal tracking worksheets)                                                                                                                                                                                                                                        |
|                         |                                                                               | Formulation of goals       |                                                                  |                                                                                                                                                                                                                                                                                                                                                                                                                                                                                                                                |
|                         |                                                                               | Follow-up                  | Evaluation of progress<br>Support for the patient                | Telephone calls: Review progress, relapse prevention, social support, future goal planning                                                                                                                                                                                                                                                                                                                                                                                                                                     |
| Kjeken et al. (2014)    | 2 individual meetings, 4 calls (after 1 week, 1 month, 4 months and 5 months) | Formulation of goals       |                                                                  | Motivational interviewing, cognitive behavioral principles; self-management booklet (2 chapters): Goal setting, motivation to change, positive self-talk, choosing what to pay attention to and worth remembering, topics of relevance for the first period after admission. Possible to answer open questions, make notes, small exercises rating scales (e.g. to rate self-efficacy), quotes goals etc. from other patients, pictures and poems + activity diary                                                             |
|                         |                                                                               | Formulation of action plan |                                                                  |                                                                                                                                                                                                                                                                                                                                                                                                                                                                                                                                |
|                         |                                                                               | Coping planning            | Assessment of confidence                                         |                                                                                                                                                                                                                                                                                                                                                                                                                                                                                                                                |
|                         |                                                                               | Follow-up                  | Support for the patient                                          | Telephone calls                                                                                                                                                                                                                                                                                                                                                                                                                                                                                                                |
| Kroese et al. (2014)    | 1 individual session and 4 group sessions, (6 - 8 participants) (3 months)    | Formulation of goals       |                                                                  | Individual and group meetings: Stimulation to set small concrete, attainable goals (focusing on eating behavior, physical activity, medical regimes, topic of own choice)                                                                                                                                                                                                                                                                                                                                                      |
|                         |                                                                               | Coping planning            | Identification of barriers                                       |                                                                                                                                                                                                                                                                                                                                                                                                                                                                                                                                |
|                         |                                                                               |                            | Formulation of strategies to overcome barriers                   |                                                                                                                                                                                                                                                                                                                                                                                                                                                                                                                                |
|                         |                                                                               | Formulation of action plan |                                                                  |                                                                                                                                                                                                                                                                                                                                                                                                                                                                                                                                |
|                         |                                                                               | Follow-up                  | Patient self-monitoring                                          | Keeping track of goals homework assignments<br>3 booster sessions (1, 3 and 4 months after the intervention)<br>"How" booster: Reinforcement of focus on small, concrete, attainable goals OR "Why" booster: Elaborating on the self-management goals in view of their higher-order overarching goals, answering the "why" question repeatedly.                                                                                                                                                                                |
| Evaluation of progress  |                                                                               |                            |                                                                  |                                                                                                                                                                                                                                                                                                                                                                                                                                                                                                                                |
| Support for the patient |                                                                               |                            |                                                                  |                                                                                                                                                                                                                                                                                                                                                                                                                                                                                                                                |

|                              | <b>Mode of delivery</b>                | <b>Phases</b>              | <b>Components</b>                              | <b>Strategies</b>                                                                                                                                                                                                                                                                                                                                                                                                                                                                                                                                                                                                               |
|------------------------------|----------------------------------------|----------------------------|------------------------------------------------|---------------------------------------------------------------------------------------------------------------------------------------------------------------------------------------------------------------------------------------------------------------------------------------------------------------------------------------------------------------------------------------------------------------------------------------------------------------------------------------------------------------------------------------------------------------------------------------------------------------------------------|
| Luszczynska (2006)           | 1 individual meeting (10 – 15 min)     | Preparation                | Patient education                              | Instructions that plans should always include the when, where and how                                                                                                                                                                                                                                                                                                                                                                                                                                                                                                                                                           |
|                              |                                        | Formulation of action plan | Formulation of action plan                     | Implementation intentions written on a form (about physical activity)                                                                                                                                                                                                                                                                                                                                                                                                                                                                                                                                                           |
|                              |                                        | Follow-up                  | Support for the patient                        | Supportive feedback                                                                                                                                                                                                                                                                                                                                                                                                                                                                                                                                                                                                             |
| Lyons et al. (2015)          | Telephone calls (6) (weekly), workbook | Preparation                | Education                                      | Workbook: Education about activity engagement and health, the benefits of regular exercise and stress management techniques                                                                                                                                                                                                                                                                                                                                                                                                                                                                                                     |
|                              |                                        |                            | Identification of topics for setting goals     | Identification of what makes an activity challenging                                                                                                                                                                                                                                                                                                                                                                                                                                                                                                                                                                            |
|                              |                                        | Formulation of goals       |                                                | Goals need to be behavioral, measurable, and achievable within the next 7 days                                                                                                                                                                                                                                                                                                                                                                                                                                                                                                                                                  |
|                              |                                        | Formulation of action plan |                                                | Plans detailing when, where and how the goal will be met                                                                                                                                                                                                                                                                                                                                                                                                                                                                                                                                                                        |
|                              |                                        | Coping planning            | Identification of barriers                     | Weighting of advantages and disadvantages of solutions                                                                                                                                                                                                                                                                                                                                                                                                                                                                                                                                                                          |
|                              |                                        |                            | Formulation of strategies to overcome barriers |                                                                                                                                                                                                                                                                                                                                                                                                                                                                                                                                                                                                                                 |
| Follow-up                    | Patient self-monitoring                | Workbook                   |                                                |                                                                                                                                                                                                                                                                                                                                                                                                                                                                                                                                                                                                                                 |
| Magar et al. (2005)          | 2 group sessions (150 min)             | Preparation                | Patient education                              | Group sessions: Education about signs of attack, medication, identification and avoiding trigger factors                                                                                                                                                                                                                                                                                                                                                                                                                                                                                                                        |
|                              |                                        |                            | Patient reflection                             | Diary for asthma symptoms                                                                                                                                                                                                                                                                                                                                                                                                                                                                                                                                                                                                       |
|                              |                                        | Formulation of action plan | Formulation of action plan                     | Group sessions: Action plan for controlling asthma including avoiding triggers, responding to warning signs, adapting treatment. Plan is based on symptoms and expiratory flow ranges, using a color system (green signals good control, yellow signals asthma is getting worse, red signals medical alert)                                                                                                                                                                                                                                                                                                                     |
| Mansson Lexell et al. (2014) | 2 individual interviews                | Preparation                | Identification of topics for setting goals     | Canadian Occupational Performance Measure (semi-structured interview):<br>Exploration of everyday activities that patient perceives difficult to perform (areas: Self-care, productivity and leisure), rating of importance of each activity, prioritizing activities (up to 5), rating the self-perceived performance and satisfaction of activities (Ratings on Visual Analogue Scale from 0 – 10)<br>Total score: Scores identified for each problem or task are added and then divided by the number of problems or tasks.<br>Evaluation of goals by rating self-perceived performance and satisfaction again at discharge. |
|                              |                                        |                            | Patient reflection                             |                                                                                                                                                                                                                                                                                                                                                                                                                                                                                                                                                                                                                                 |
|                              |                                        | Formulation of goals       |                                                |                                                                                                                                                                                                                                                                                                                                                                                                                                                                                                                                                                                                                                 |
|                              |                                        | Follow-up                  | Evaluation of progress                         |                                                                                                                                                                                                                                                                                                                                                                                                                                                                                                                                                                                                                                 |



|                           | Mode of delivery                                                           | Phases                     | Components                                 | Strategies                                                                                                                                                                                                                                                                                                                                                                                                                                                                                                                                                                                                                                                                                                                                                                                                   |
|---------------------------|----------------------------------------------------------------------------|----------------------------|--------------------------------------------|--------------------------------------------------------------------------------------------------------------------------------------------------------------------------------------------------------------------------------------------------------------------------------------------------------------------------------------------------------------------------------------------------------------------------------------------------------------------------------------------------------------------------------------------------------------------------------------------------------------------------------------------------------------------------------------------------------------------------------------------------------------------------------------------------------------|
| McConkey & Collins (2010) | 3 individual interviews (each 9 months apart, with presence of key worker) | Formulation of goals       |                                            | Individual structured interviews (with presence of key worker): 3 goals related to doing things with people and being involved in the communities for the next 6 – 9 months; participants were encouraged to independently identify activities to set goals on, goals formulated as precisely and as detailed possible; Goal record Sheet: Recording goals                                                                                                                                                                                                                                                                                                                                                                                                                                                   |
|                           |                                                                            | Follow-up                  | Evaluation of progress                     | Individual structured interviews (with presence of key worker): Discussion of factors that assisted or hindered the achievement of goals, Goal record Sheet: Recording goals and comment on what had proved helpful                                                                                                                                                                                                                                                                                                                                                                                                                                                                                                                                                                                          |
| Morganstern et al. (2011) | 2 interviews via phone (prior and after surgery)                           | Preparation                | Patient reflection                         | Brief Quality of Life Appraisal Profile: Patients are asked to respond to seven probes, representing different motivational orientations: achievement, problem resolution, prevention or avoidance of problems, maintenance or keeping situations as they are known, acceptance of circumstance, disengagement from roles and responsibilities and reaching life events or milestones (Example: In order to have the most satisfying life possible, what are the main things that you want to accomplish?), For each probe, patients were asked to provide up to 3 current goals (complete the goal statement “I want to..”); discussion and rating of level of difficulty of actions to reach the goals, discussion and rating of need for support                                                          |
|                           |                                                                            | Formulation of goals       |                                            |                                                                                                                                                                                                                                                                                                                                                                                                                                                                                                                                                                                                                                                                                                                                                                                                              |
|                           |                                                                            | Formulation of action plan |                                            |                                                                                                                                                                                                                                                                                                                                                                                                                                                                                                                                                                                                                                                                                                                                                                                                              |
|                           |                                                                            | Coping planning            | Identification of facilitators             |                                                                                                                                                                                                                                                                                                                                                                                                                                                                                                                                                                                                                                                                                                                                                                                                              |
|                           |                                                                            | Follow-up                  | Evaluation of progress                     | Rate progress on a scale from 0 – 10                                                                                                                                                                                                                                                                                                                                                                                                                                                                                                                                                                                                                                                                                                                                                                         |
| Mullis & Hay (2010)       | 1 individual interview                                                     | Preparation                | Identification of topics for setting goals | Individual semi-structured interview: Problem areas restricted to problems directly attributed to back pain                                                                                                                                                                                                                                                                                                                                                                                                                                                                                                                                                                                                                                                                                                  |
|                           |                                                                            | Formulation of goals       |                                            | Individual semi structured interview: Specific goals, asking questions about what patient would like to do, their past, the most important areas and about the problems that have the greatest impact, prioritizing 3 goals, Goal Attainment Scaling (GAS): Use of a 5-point scale (Zero point: Expected outcome/goal, +1: a somewhat better than expected outcome, +2: the most favorable outcome, -1: a less than expected outcome, -2: the least favorable outcome)                                                                                                                                                                                                                                                                                                                                       |
| Murphy & Boa (2012)       | Not specified                                                              | Preparation                | Identification of topics for setting goals | 1) Choosing a topic that the participant wants to talk about in relation to a specific issue (e.g. activities, environment, relationship, self-care), 2) Choosing options to talk about specifically related to a chosen topic (e.g. activities playing card games), 3) Indication of general feelings about each topic and option (e.g. whether they are happy, unsure); Talking Mats: Low-priced textured mat and picture symbols with Velcro attached to the back so that they can be placed on the mat and moved around. 3 sets of “Picture Communication Symbols”: Topics, options and visual scale for indicating feelings, ICF: The ICF wording (activities and participation) was adjusted and the nine ICF domains matched to symbols of Talking Mats. A final set of 180 symbols/options were used |
|                           |                                                                            | Formulation of goals       |                                            |                                                                                                                                                                                                                                                                                                                                                                                                                                                                                                                                                                                                                                                                                                                                                                                                              |

|                        | <b>Mode of delivery</b>                                                                                                               | <b>Phases</b>              | <b>Components</b>                          | <b>Strategies</b>                                                                                                                                                                                                                                                                                                                                                                                                       |                                                                            |                                                                                                                                                                                                                      |
|------------------------|---------------------------------------------------------------------------------------------------------------------------------------|----------------------------|--------------------------------------------|-------------------------------------------------------------------------------------------------------------------------------------------------------------------------------------------------------------------------------------------------------------------------------------------------------------------------------------------------------------------------------------------------------------------------|----------------------------------------------------------------------------|----------------------------------------------------------------------------------------------------------------------------------------------------------------------------------------------------------------------|
| Naik et al. (2011)     | 4 group sessions (5 - 7 members, 60 min, every 3 weeks over a 3 month period), 10 min individual interaction after each group session | Preparation                | Patient education                          | Group sessions: Didactic education about diabetes and common risk factors, problem-based group discussion, group discussion, consultation time with clinical, instruction of principles of goal setting theory (goals specificity, difficulty, and importance) and setting goals together with physician; workbook                                                                                                      |                                                                            |                                                                                                                                                                                                                      |
|                        |                                                                                                                                       | Formulation of goals       |                                            | Group sessions: Setting goals focusing on diet and exercise changes, home monitoring and medication effects, communication with physicians about medications, sleep, pain, barriers to self-management                                                                                                                                                                                                                  |                                                                            |                                                                                                                                                                                                                      |
|                        |                                                                                                                                       | Formulation of action plan |                                            | Discussion of action plans with peers and physicians                                                                                                                                                                                                                                                                                                                                                                    |                                                                            |                                                                                                                                                                                                                      |
|                        |                                                                                                                                       | Follow-up                  | Evaluation of progress                     |                                                                                                                                                                                                                                                                                                                                                                                                                         |                                                                            |                                                                                                                                                                                                                      |
| Nuovo et al. (2009)    | 4 group sessions (120 min)                                                                                                            | Preparation                | Patient education                          | Group sessions: Education about disease process, treatment options, nutrition physical activity, medication, monitoring blood glucose, complications, personal strategies for health and behavior change in group sessions using PowerPoint, white board, flip charts.                                                                                                                                                  |                                                                            |                                                                                                                                                                                                                      |
|                        |                                                                                                                                       |                            | Identification of topics for setting goals | Decision wheel with the following topics: weight, monitoring, exercise, depression, smoking, alcohol, sodium, medication, stress, nutrition. First prompt: "What would you like to talk about today". Then answering questions on the back of the decision wheel "My experiment this week", "When I will do it", "Where I will do it", "How often I will do it", "What might get in the way", "What can I do about it"? |                                                                            |                                                                                                                                                                                                                      |
|                        |                                                                                                                                       | Coping planning            | Formulation of action plan                 | Identification of barriers<br>Formulation of strategies to overcome barriers<br>Assessment of confidence                                                                                                                                                                                                                                                                                                                | Rating of estimation of success "How successful do you think you will be?" |                                                                                                                                                                                                                      |
|                        |                                                                                                                                       |                            | Follow-up                                  |                                                                                                                                                                                                                                                                                                                                                                                                                         | Evaluation of progress                                                     | Group sessions                                                                                                                                                                                                       |
|                        |                                                                                                                                       |                            | Formulation of action plan                 |                                                                                                                                                                                                                                                                                                                                                                                                                         | Formulation of action plan                                                 | Counseling with pharmacist: Setting 1 – 2 goals related to AR that are personally relevant to the patient and formulating actions to achieve those goals; recording goals and actions on a Card "My Treatment Goals" |
|                        |                                                                                                                                       | Follow-up                  | Patient self-monitoring                    |                                                                                                                                                                                                                                                                                                                                                                                                                         |                                                                            |                                                                                                                                                                                                                      |
| O'Connor et al. (2008) | 3 individual meetings (baseline, 1 week after baseline and 6 weeks after baseline)                                                    | Preparation                | Patient education                          | Brochure about AR and about identification and avoidance of triggers                                                                                                                                                                                                                                                                                                                                                    |                                                                            |                                                                                                                                                                                                                      |
|                        |                                                                                                                                       | Formulation of goals       |                                            | Counseling with pharmacist: Setting 1 – 2 goals related to AR that are personally relevant to the patient and formulating actions to achieve those goals; recording goals and actions on a Card "My Treatment Goals"                                                                                                                                                                                                    |                                                                            |                                                                                                                                                                                                                      |
|                        |                                                                                                                                       | Formulation of action plan | Formulation of action plan                 |                                                                                                                                                                                                                                                                                                                                                                                                                         |                                                                            |                                                                                                                                                                                                                      |
|                        |                                                                                                                                       | Follow-up                  | Patient self-monitoring                    |                                                                                                                                                                                                                                                                                                                                                                                                                         |                                                                            |                                                                                                                                                                                                                      |

|                         | <b>Mode of delivery</b>                                        | <b>Phases</b>                                                                                       | <b>Components</b>                              | <b>Strategies</b>                                                                                                                                                                                                                                                                                                                                                                                                                                                                                                                                                                                                                                                                           |
|-------------------------|----------------------------------------------------------------|-----------------------------------------------------------------------------------------------------|------------------------------------------------|---------------------------------------------------------------------------------------------------------------------------------------------------------------------------------------------------------------------------------------------------------------------------------------------------------------------------------------------------------------------------------------------------------------------------------------------------------------------------------------------------------------------------------------------------------------------------------------------------------------------------------------------------------------------------------------------|
| Pagels et al. (2015)    | 3 group sessions (3 consecutive days, 6 hours, 6 participants) | Preparation                                                                                         | Education                                      | Written educational material about the disease, multidisciplinary oral presentations, group discussions, Practicing blood glucose controls, injections technique, Nordic walking and seated gymnastics; medical review: Consultation with nephrologist and diabetologist for medical review and adjustment of present medical prescriptions                                                                                                                                                                                                                                                                                                                                                 |
|                         |                                                                |                                                                                                     | Patient reflection                             | Worksheets: Participants fill in their health situation with respect to disease related factors such as glucose control or smoking                                                                                                                                                                                                                                                                                                                                                                                                                                                                                                                                                          |
|                         |                                                                | Formulation of goals                                                                                |                                                | Group discussions and worksheets: Participants set and record short-term and long-term health goals (for health and healthy life style behavior), according to the SMART model (specific, measurable, attainable, relevant and time-bound)                                                                                                                                                                                                                                                                                                                                                                                                                                                  |
| Power et al. (2011)     | 1 interview with patient and caregiver                         | Follow-up                                                                                           | Support for the patient                        | Feedback on performance                                                                                                                                                                                                                                                                                                                                                                                                                                                                                                                                                                                                                                                                     |
|                         |                                                                | Preparation                                                                                         | Identification of topics for setting goals     | Semi-structured interview (open ended questions and probes) with patient and caregiver: exploration of communication-related activities and participation, current and future issues, structured according to ICF framework (functioning, disabilities, activities, participation, personal and environmental factors and potential future communication issues), use of Rehabilitation Problem Solving Form (RPS): Form to document patient and family perspectives of problems and disabilities and professional's perspective on mediators relevant to target problem (adding for this study: section for patient and family opinions on environmental, personal factors, future issues) |
|                         |                                                                | Formulation of goals                                                                                |                                                |                                                                                                                                                                                                                                                                                                                                                                                                                                                                                                                                                                                                                                                                                             |
| Schneider et al. (2011) | Several coaching sessions distributed over one year            | Preparation                                                                                         | Identification topics for setting goals        | Use of open-ended questions; motivational interviewing                                                                                                                                                                                                                                                                                                                                                                                                                                                                                                                                                                                                                                      |
|                         |                                                                | Formulation of goals                                                                                |                                                | SMART goals for work, health and personal goals: specific, measurable, attainable, realistic, and timed                                                                                                                                                                                                                                                                                                                                                                                                                                                                                                                                                                                     |
|                         |                                                                | Formulation of action plan                                                                          |                                                |                                                                                                                                                                                                                                                                                                                                                                                                                                                                                                                                                                                                                                                                                             |
|                         |                                                                | Coping planning                                                                                     | Identification of barriers                     |                                                                                                                                                                                                                                                                                                                                                                                                                                                                                                                                                                                                                                                                                             |
|                         |                                                                |                                                                                                     | Formulation of strategies to overcome barriers |                                                                                                                                                                                                                                                                                                                                                                                                                                                                                                                                                                                                                                                                                             |
|                         |                                                                |                                                                                                     | Identification of support                      |                                                                                                                                                                                                                                                                                                                                                                                                                                                                                                                                                                                                                                                                                             |
| Follow-up               | Patient self-Monitoring                                        | Secure online coaching tool to put in goals, to update progress and to communicate between sessions |                                                |                                                                                                                                                                                                                                                                                                                                                                                                                                                                                                                                                                                                                                                                                             |

|                         | Mode of delivery                                                                                       | Phases                     | Components                                                 | Strategies                                                                                                                                                                                                                                                           |
|-------------------------|--------------------------------------------------------------------------------------------------------|----------------------------|------------------------------------------------------------|----------------------------------------------------------------------------------------------------------------------------------------------------------------------------------------------------------------------------------------------------------------------|
| Schreuers et al. (2003) | 5 group sessions (2 hours, 6 - 8 participants, 4 sessions biweekly, 1 session after 4 weeks), workbook | Preparation                | Patient reflection                                         | Individual intake with a nurse: Reflection of and assessment of self-management behavior and knowledge                                                                                                                                                               |
|                         |                                                                                                        |                            | Patient education                                          | Workbook: Education about disease related themes: Physical condition, prevention of exacerbation, coping with negative emotions, giving and seeking social support                                                                                                   |
|                         |                                                                                                        | Formulation of goals       |                                                            | Group discussions about personal goals and action plans, advice from the group about specificity and attainability, workbook with worksheets for action plans                                                                                                        |
|                         |                                                                                                        | Formulation of action plan |                                                            |                                                                                                                                                                                                                                                                      |
|                         |                                                                                                        | Follow-up                  | Patient self-monitoring                                    | Written daily register                                                                                                                                                                                                                                               |
| Evaluation of progress  | Subsequent group sessions                                                                              |                            |                                                            |                                                                                                                                                                                                                                                                      |
| Scobbie et al. (2010)   | Continuous process (in rehabilitation)                                                                 | Preparation                | Identification of topics for setting goals                 | Goal negotiation: Appraisal of current situation and identification of the main problems, techniques to increase motivation, self-efficacy and positive outcome expectations such as verbal persuasion, modelling, re-interpretation of symptoms, mastery experience |
|                         |                                                                                                        |                            |                                                            | Formulation of goals                                                                                                                                                                                                                                                 |
|                         |                                                                                                        | Formulation of action plan | Action plans: when, where and how, can it be written down? |                                                                                                                                                                                                                                                                      |
|                         |                                                                                                        | Coping planning            | Assessment of confidence                                   | Self-report                                                                                                                                                                                                                                                          |
|                         |                                                                                                        |                            | Identification of barriers                                 |                                                                                                                                                                                                                                                                      |
|                         |                                                                                                        |                            | Formulation of strategies to overcome barriers             |                                                                                                                                                                                                                                                                      |
|                         |                                                                                                        | Follow-up                  | Support for the patient                                    | Appraisal of performance, measuring of progress and giving feedback, continuous reflection: Possible to go back to negotiation, setting or planning                                                                                                                  |
| Evaluation of progress  |                                                                                                        |                            |                                                            |                                                                                                                                                                                                                                                                      |
|                         | Patient self-monitoring                                                                                |                            |                                                            |                                                                                                                                                                                                                                                                      |
| Sniehotta et al. (2005) | Independent of professional (after discharge from rehabilitation)                                      | Formulation of action plan |                                                            | Planning booklet with 2 planning sheets:<br>Action planning sheet: Room for 3 action plans for physical activity (When, Where, How, With Whom) + Coping planning sheet: Recording possible obstacles and coping plans                                                |
|                         |                                                                                                        |                            | Coping planning                                            |                                                                                                                                                                                                                                                                      |
|                         |                                                                                                        |                            |                                                            | Formulation of strategies to overcome barriers                                                                                                                                                                                                                       |
|                         |                                                                                                        | Follow-up                  | Patient self-monitoring                                    | Personalized Weekly Diary: Six weekly diaries by mail, recording progress, rating self-efficacy to adherence to plan and modify plans if necessary                                                                                                                   |

|                           | <b>Mode of delivery</b>                                                           | <b>Phases</b>                                                                          | <b>Components</b>                              | <b>Strategies</b>                                                                                                                                                                                                                                                                                                                                                        |
|---------------------------|-----------------------------------------------------------------------------------|----------------------------------------------------------------------------------------|------------------------------------------------|--------------------------------------------------------------------------------------------------------------------------------------------------------------------------------------------------------------------------------------------------------------------------------------------------------------------------------------------------------------------------|
| Stuifbergen et al. (2003) | 8 group sessions (weekly), 6 calls (biweekly calls over 3 month period)           | Preparation                                                                            | Patient education                              | Group sessions: Education about lifestyle adjustment, physical activity, stress management, nutrition, healthcare responsibilities                                                                                                                                                                                                                                       |
|                           |                                                                                   | Formulation of goals                                                                   |                                                | Group sessions: Worksheets are filled in at the end of each session incorporating goals, barriers and resources; Goal Attainment Scaling (GAS) via telephone: Use of a 5-point scale (Zero point: Expected outcome/goal, +1: a somewhat better than expected outcome, +2: the most favorable outcome, -1: a less than expected outcome, -2: the least favorable outcome) |
|                           |                                                                                   | Coping planning                                                                        | Identification of barriers                     |                                                                                                                                                                                                                                                                                                                                                                          |
|                           |                                                                                   |                                                                                        | Identification of facilitators                 |                                                                                                                                                                                                                                                                                                                                                                          |
|                           |                                                                                   | Follow-up                                                                              | Evaluation of progress                         | Telephone calls: Evaluation of progress and assistance in finding ways to overcome barriers, techniques to enhance self-efficacy: verbal persuasion, recognizing performance accomplishments, relating information about successful lifestyle changes of patients                                                                                                        |
|                           | Support for the patient                                                           |                                                                                        |                                                |                                                                                                                                                                                                                                                                                                                                                                          |
| Steuer-Stey et al. (2015) | 2 group sessions (whole day), 2 refresher sessions (120 min after 4 and 12 weeks) | Preparation                                                                            | Patient reflection                             | Activation of personal resources: Patients are shown a set of pictures eliciting positive feelings and asked which picture evokes positive somatic responses (e.g. pleasant body feeling)                                                                                                                                                                                |
|                           |                                                                                   | Formulation of goals                                                                   |                                                | Action- oriented personal goals; discussion in small groups; writing down goals, actions and potential barriers.                                                                                                                                                                                                                                                         |
|                           |                                                                                   | Formulation of action plan                                                             |                                                |                                                                                                                                                                                                                                                                                                                                                                          |
|                           |                                                                                   | Coping planning                                                                        | Identification of barriers                     | Embodiment techniques, development of individual goal-related embodiment                                                                                                                                                                                                                                                                                                 |
|                           |                                                                                   |                                                                                        | Identification of facilitators                 |                                                                                                                                                                                                                                                                                                                                                                          |
| Follow-up                 | Evaluation of progress                                                            | Follow-up sessions: Discussion of goal progress and revision, transfer into daily life |                                                |                                                                                                                                                                                                                                                                                                                                                                          |
| Theunissen et al. (2003)  | 1 consultation (2 different conditions that are compared)                         | Preparation                                                                            | Patient reflection                             | Condition 1: Discussion of illness representation, focus on adherence to blood pressure management advise; cognitive illness representation ("how do you think..."), emotional illness representation ("how do you feel..")                                                                                                                                              |
|                           |                                                                                   | Formulation of action plan                                                             |                                                | Condition 2: Discussion of action plans, focus on adherence to blood pressure management advise, use of mental contrasting (a tool to envision possibilities and develop plans for bringing those possibilities about, by using one's imagination)                                                                                                                       |
| Thoolen et al. (2009)     | 2 individual sessions, 4 group sessions (120 min, over 12 weeks), workbook        | Preparation                                                                            | Patient reflection                             | Individual session and group session: Discussion of experience with diabetes                                                                                                                                                                                                                                                                                             |
|                           |                                                                                   | Formulation of goals                                                                   |                                                | Group sessions: Set small, concrete and attainable goals and actions for physical exercise, diet and medication                                                                                                                                                                                                                                                          |
|                           |                                                                                   | Formulation of action plan                                                             |                                                |                                                                                                                                                                                                                                                                                                                                                                          |
|                           |                                                                                   | Coping planning                                                                        | Identification of barriers                     | Mental simulation (to help patients become more proactive, helping them anticipate potential barriers and virtually try out their goals and action plans); workbook for patients                                                                                                                                                                                         |
|                           |                                                                                   |                                                                                        | Formulation of strategies to overcome barriers |                                                                                                                                                                                                                                                                                                                                                                          |
| Follow-up                 | Patient self-monitoring                                                           | Written daily register of goal-attainment over 2 weeks                                 |                                                |                                                                                                                                                                                                                                                                                                                                                                          |

|                          | Mode of delivery                                                                     | Phases                     | Components                                     | Strategies                                                                                                                                                                                                                                                                                                                                                                                                                                                                                                                                                                                                                               |
|--------------------------|--------------------------------------------------------------------------------------|----------------------------|------------------------------------------------|------------------------------------------------------------------------------------------------------------------------------------------------------------------------------------------------------------------------------------------------------------------------------------------------------------------------------------------------------------------------------------------------------------------------------------------------------------------------------------------------------------------------------------------------------------------------------------------------------------------------------------------|
| Thielemans et al. (2014) | 6 group sessions (120 min, 4 – 8 participants, 6 weeks), 1 booster session (week 10) | Preparation                | Patient reflection                             | Group sessions and workbook: Exchanging of experience with stroke, education about consequences of stroke, setting goals also non-stroke related                                                                                                                                                                                                                                                                                                                                                                                                                                                                                         |
|                          |                                                                                      |                            | Education                                      |                                                                                                                                                                                                                                                                                                                                                                                                                                                                                                                                                                                                                                          |
|                          |                                                                                      | Formulation of goals       |                                                |                                                                                                                                                                                                                                                                                                                                                                                                                                                                                                                                                                                                                                          |
|                          |                                                                                      | Coping planning            | Identification of barriers                     |                                                                                                                                                                                                                                                                                                                                                                                                                                                                                                                                                                                                                                          |
|                          |                                                                                      |                            | Formulation of strategies to overcome barriers |                                                                                                                                                                                                                                                                                                                                                                                                                                                                                                                                                                                                                                          |
|                          |                                                                                      | Formulation of action plan |                                                |                                                                                                                                                                                                                                                                                                                                                                                                                                                                                                                                                                                                                                          |
| Follow-up                | Evaluation of progress                                                               |                            |                                                |                                                                                                                                                                                                                                                                                                                                                                                                                                                                                                                                                                                                                                          |
| Tomori et al. (2012)     | Application iPad (used together by patient and therapist)                            | Preparation                | Identification of topics for setting goals     | Aid for decision making in Occupational Choice: Application for the iPad with 94 illustrations describing daily activities related to activities and participation in the ICF, incorporating an importance-urgency matrix: Selection of important occupations (up to 20), rating of degree of importance by patient and by therapist (on 4-point scale), selection of 5 occupations, prioritizing occupation, rating degree of satisfaction for each occupation                                                                                                                                                                          |
|                          |                                                                                      | Formulation of goals       |                                                | Documentation: Print out of therapy plan (goals and actions), patient and therapist sign the plan                                                                                                                                                                                                                                                                                                                                                                                                                                                                                                                                        |
|                          |                                                                                      | Formulation of action plan |                                                |                                                                                                                                                                                                                                                                                                                                                                                                                                                                                                                                                                                                                                          |
| Toto et al. (2015)       | 1 individual session                                                                 | Preparation                | Identification of topics for setting goals     | Semi structured interview, using the Canadian Occupational Performance (COPM) Measure as a framework: Hour by hour review of participants typical daily routine. Areas: self-care, productivity, leisure; exploration of everyday activities participants needed, wanted to do and were expected to do, rating of importance of each activity, selection of 2 – 4 activities for goal setting, Goal Attainment Scaling (GAS): Use of a 5-point scale (Zero point: Expected outcome/goal, +1: a somewhat better than expected outcome, +2: the most favorable outcome, -1: a less than expected outcome, -2: the least favorable outcome) |
|                          |                                                                                      | Formulation of goals       |                                                |                                                                                                                                                                                                                                                                                                                                                                                                                                                                                                                                                                                                                                          |
| Tripicchio et al. (2009) | Whole process of treatment planning                                                  | Preparation                | Identification of topics for setting goals     | Use of different questions: What are your concerns? What are your goals? What has been accomplished? What actions have resulted in successful outcomes?, for each question 3 process: Exploration, selection (prioritizing), specification; use of 5 levels of patient participation: open-ended questioning, multiple choice, confirmed choice, forced choice and prescription                                                                                                                                                                                                                                                          |
|                          |                                                                                      | Formulation of goals       |                                                |                                                                                                                                                                                                                                                                                                                                                                                                                                                                                                                                                                                                                                          |
|                          |                                                                                      | Formulation of action plan |                                                |                                                                                                                                                                                                                                                                                                                                                                                                                                                                                                                                                                                                                                          |

|                            | <b>Mode of delivery</b>                                                                    | <b>Phases</b>              | <b>Components</b>                              | <b>Strategies</b>                                                                                                                                                                                                                                                                                                                         |
|----------------------------|--------------------------------------------------------------------------------------------|----------------------------|------------------------------------------------|-------------------------------------------------------------------------------------------------------------------------------------------------------------------------------------------------------------------------------------------------------------------------------------------------------------------------------------------|
| Voils et al. (2013)        | 9 patient calls (monthly), 9 spouses calls (monthly)                                       | Preparation                | Patient education                              | Written information about hypercholesterolemia and self-management principles; information about strategies to support patient goal achievement for spouses                                                                                                                                                                               |
|                            |                                                                                            | Formulation of goals       |                                                | Patient calls: Measurable behavioral goals and action plans, patients are allowed to choose one behavior to focus on, recording of goals and action plans on provided paper, goals focusing on diet, physical activity, patient-physician communication, medication adherence, rating confidence to achieve the goals (on 10 point scale) |
|                            |                                                                                            | Formulation of action plan |                                                |                                                                                                                                                                                                                                                                                                                                           |
|                            |                                                                                            | Coping planning            | Assessment of confidence                       |                                                                                                                                                                                                                                                                                                                                           |
|                            |                                                                                            | Follow-up                  | Evaluation of progress                         | Patient calls; spouses calls: Information about patient goal and development of a specific behavior plan to support patient goal achievement.                                                                                                                                                                                             |
| Support for patient        |                                                                                            |                            |                                                |                                                                                                                                                                                                                                                                                                                                           |
| Walker et al. (2009)       | WebEase (interactive web site)                                                             | Preparation                | Patient reflection                             | Web Ease (Interactive website): Diary (recording symptoms, medication taking, stress level, sleep habits)                                                                                                                                                                                                                                 |
|                            |                                                                                            |                            | Patient education                              | Web Ease : Learning modules, discussion board, fact sheets, quizzes                                                                                                                                                                                                                                                                       |
|                            |                                                                                            | Coping planning            | Identification of barriers                     | Web Ease                                                                                                                                                                                                                                                                                                                                  |
|                            |                                                                                            |                            | Formulation of strategies to overcome barriers |                                                                                                                                                                                                                                                                                                                                           |
|                            |                                                                                            | Formulation of goals       |                                                | Goals for sleep, stress, medication; SMART method (Specific, Measurable, Attainable, Realistic, and Timely), Web Ease                                                                                                                                                                                                                     |
|                            |                                                                                            | Formulation of action plan |                                                | Web Ease                                                                                                                                                                                                                                                                                                                                  |
|                            |                                                                                            | Follow-up                  | Evaluation of progress                         |                                                                                                                                                                                                                                                                                                                                           |
| Wolever et al. (2010)      | 14 telephone calls (30 minutes, 9 weekly calls, 4 biweekly calls and 1 call after 1 month) | Preparation                | Patient education                              | Binder of educational materials                                                                                                                                                                                                                                                                                                           |
|                            |                                                                                            |                            | Patient reflection                             |                                                                                                                                                                                                                                                                                                                                           |
|                            |                                                                                            | Formulation of goals       |                                                | Long-term goals for health aligned with vision of health                                                                                                                                                                                                                                                                                  |
| Formulation of action plan |                                                                                            | Small and realistic        |                                                |                                                                                                                                                                                                                                                                                                                                           |

|                            | <b>Mode of delivery</b>                                                                                                                        | <b>Phases</b>        | <b>Components</b>                  | <b>Strategies</b>                                                                                                                                                                                                                                                                                                                                                                                                                                                                                                                                                                                                                            |
|----------------------------|------------------------------------------------------------------------------------------------------------------------------------------------|----------------------|------------------------------------|----------------------------------------------------------------------------------------------------------------------------------------------------------------------------------------------------------------------------------------------------------------------------------------------------------------------------------------------------------------------------------------------------------------------------------------------------------------------------------------------------------------------------------------------------------------------------------------------------------------------------------------------|
| Van der Wulp et al. (2012) | 3 monthly home visits (1 hour),<br>3 calls (2 weeks after the visit),<br>possibility to contact expert patient<br>at any time by phone or mail | Preparation          | Patient reflection                 | Exploration of areas for lifestyle change, appointment of importance and feasibility of life style change, focus on increasing patients' self-efficacy, improving physical activity and dietary habits, motivational interviewing                                                                                                                                                                                                                                                                                                                                                                                                            |
|                            |                                                                                                                                                |                      | Identification of important topics |                                                                                                                                                                                                                                                                                                                                                                                                                                                                                                                                                                                                                                              |
|                            |                                                                                                                                                | Formulation of goals |                                    | Feasible goals to work on the upcoming month                                                                                                                                                                                                                                                                                                                                                                                                                                                                                                                                                                                                 |
|                            |                                                                                                                                                | Coping planning      | Identification of barrier          |                                                                                                                                                                                                                                                                                                                                                                                                                                                                                                                                                                                                                                              |
| Zhang et al. (2015)        | 1 scheduled routine appointment                                                                                                                | Preparation          | Patient reflection                 | Rating of importance of values: Modified version of the Personal Value Card Sorting Task, 5 domains of values (symptom-relief, physical well-being, social relationships, autonomy, hedonism)                                                                                                                                                                                                                                                                                                                                                                                                                                                |
|                            |                                                                                                                                                | Formulation of goals |                                    | Goal setting (top 5, based on importance of values), 20 goal cards (based on domains of values): Participants are asked to sort each of the 20 goal cards into 3 piles "very important", "somewhat important", "less important", measuring patient' s perception of compatibility of goals set with prescribed self-care behaviors (daily weighing, limiting sodium/ fluids and physical activity): The Competing Goals Task: Moving a tab along a -10 (not at all compatible) to +10 (very compatible) horizontal scale to indicate the degree to which they judge a self-care regimen facilitated or impeded achievement of a top 5 goals. |
